# Supplementary material for: Chemodiversity of the Glucosinolate-Myrosinase System at the Single Cell Type Resolution
Source: PubMed Central journal article supplement (PMC6536577; doi:10.3389/fpls.2019.00618), 2019-05-21
Supplement: Table_1.pdf [file Table_1.pdf]

**Supplemental Table 1. Subcellular localization of Arabidopsis proteins involved in glucosinolate-myrosinase (GM) system using six different tools (Plant-mPLOC, TAIR, Eplant, TargetP, LocTree and ngLOC) along with evidence from literature.** The six software tools are: a) Plant-mPLOC (<http://www.csbio.sjtu.edu.cn/bioinf/plant-multi/>); (b) TAIR (<https://www.arabidopsis.org/tools/bulk/protein/index.jsp>); (c) Eplant (<https://bar.utoronto.ca/eplant/>); (d) TargetP (<http://www.cbs.dtu.dk/services/TargetP/>). Scores are from 1 to 5, with 1 indicating the strongest prediction; (e) LocTree (<https://roslab.org/services/loctree3/>); (f) ngLOC (<http://genome.unmc.edu/ngLOC/index.html>). LocTree and ngLOC use a 0 to 100 scale, with 100 being the most probable prediction. The final score indicates out of the six tools the number of consensus predictions. Ribulose-1,5-bisphosphate carboxylase/oxygenase (RuBisCO) was used as a positive control for subcellular localization prediction.

| Gene name                                                    | Locus     | Abbreviation | Swiss Prot ID | Amino acid | Plant-mPLOC <sup>a</sup>   | TAIR <sup>b</sup>       | Eplant <sup>c</sup> /Score | TargetP <sup>d</sup> /Score | LocTree <sup>e</sup> /Score | ngLOC <sup>f</sup> /Score | Final score/Localization | References |                    |    |   |             |                                     |
|--------------------------------------------------------------|-----------|--------------|---------------|------------|----------------------------|-------------------------|----------------------------|-----------------------------|-----------------------------|---------------------------|--------------------------|------------|--------------------|----|---|-------------|-------------------------------------|
| <b>ALIPHATIC GLUCOSINOLATE BIOSYNTHESIS AND MODIFICATION</b> |           |              |               |            |                            |                         |                            |                             |                             |                           |                          |            |                    |    |   |             |                                     |
| Branched-chain amino acid aminotransferase 3                 | AT3G49680 | BCAT3        | Q9M401        | 413        | Chloroplast                | Chloroplast             | Plastid                    | 88                          | Chloroplast                 | 2                         | Chloroplast              | 99         | Chloroplast        | 74 | 5 | Chloroplast | Diebold et al., 2002                |
| Branched-chain amino acid aminotransferase 4                 | AT3G19710 | BCAT4        | Q9LE06        | 354        | Chloroplast                | Undefined               | Cytosol                    | 54                          | Any other                   | 3                         | Cytoplasm                | 99         | Cytoplasm          | 27 | 2 | Cytosol     | Schuster et al., 2006               |
| Bile acid transporter 5                                      | AT4G12030 | BAT5         | Q94A17        | 407        | Cell membrane              | Other (e.g. Cytoplasm)  | Plastid                    | 22                          | Chloroplast                 | 4                         | Golgi membrane           | 86         | Plasma membrane    | 15 | 2 | Chloroplast | Diebold et al., 2002                |
| Isopropylmalate isomerase large subunit 1                    | AT4G13430 | AtLeuC       | Q94AR8        | 509        | Chloroplast, Mitochondrion | Chloroplast             | Plastid                    | 58                          | Chloroplast                 | 1                         | Mitochondrion            | 81         | Nucleus            | 13 | 3 | Chloroplast | He et al., 2010                     |
| Isopropylmalate isomerase small subunit 1                    | AT2G43100 | AtLeuD1      | Q9ZW84        | 256        | Cytoplasm, Mitochondrion   | Chloroplast             | Plastid                    | 56                          | Chloroplast                 | 1                         | Mitochondrion            | 87         | Chloroplast        | 16 | 3 | Chloroplast | He et al., 2010; Knill et al., 2009 |
| Isopropylmalate isomerase small subunit 2                    | AT3G58990 | AtLeuD2      | Q9LYT7        | 253        | Mitochondrion              | Chloroplast             | Plastid                    | 46                          | Chloroplast                 | 1                         | Cytoplasm                | 86         | Chloroplast        | 16 | 3 | Chloroplast |                                     |
| Isopropylmalate dehydrogenase 1                              | AT5G14200 | AtIPMDH1     | Q9FMT1        | 409        | Chloroplast, Cytoplasm     | Undefined               | Plastid                    | 64                          | Any other                   | 5                         | Chloroplast              | 96         | Chloroplast        | 65 | 3 | Chloroplast | He et al., 2009                     |
| Isopropylmalate dehydrogenase 2                              | AT1G80560 | AtIPMDH2     | P93832        | 405        | Chloroplast, Cytoplasm     | Undefined               | Plastid                    | 70                          | Chloroplast                 | 4                         | Chloroplast              | 97         | Chloroplast        | 68 | 4 | Chloroplast | He et al., 2010                     |
| Isopropylmalate dehydrogenase 3                              | AT1G31180 | AtIPMDH3     | Q9SA14        | 404        | Chloroplast, Cytoplasm     | Undefined               | Plastid                    | 64                          | Mitochondrion               | 5                         | Chloroplast              | 96         | Chloroplast        | 65 | 3 | Chloroplast | He et al., 2010                     |
| Methylthioalkylmalate synthase 1                             | AT5G23010 | MAM1         | Q9FG67        | 506        | Chloroplast                | Chloroplast             | Plastid                    | 70                          | Chloroplast                 | 1                         | Chloroplast              | 95         | Chloroplast        | 53 | 5 | Chloroplast | Kroymann et al., 2001               |
| Methylthioalkylmalate synthase 3                             | AT5G23020 | MAM3         | Q9FN52        | 503        | Chloroplast                | Chloroplast             | Plastid                    | 56                          | Chloroplast                 | 3                         | Chloroplast              | 99         | Chloroplast        | 77 | 5 | Chloroplast | Textor et al., 2007                 |
| Cytochrome P450 79F1                                         | AT1G16410 | CYP79F1      | Q949U1        | 538        | Endoplasmic reticulum (ER) | Secreted                | ER                         | 46                          | Secretory                   | 1                         | ER                       | 99         | ER                 | 82 | 4 | ER          | Reintanz et al., 2001               |
| Cytochrome P450 79F2                                         | AT1G16400 | CYP79F2      | Q9FUY7        | 537        | ER                         | Secreted                | ER                         | 48                          | Secretory                   | 1                         | ER                       | 99         | ER                 | 81 | 4 | ER          | Reintanz et al., 2001               |
| Cytochrome P450 83A1                                         | AT4G13770 | CYP83A1      | P48421        | 502        | ER                         | Undefined               | ER                         | 38                          | Secretory                   | 5                         | ER                       | 84         | ER                 | 12 | 4 | ER          | Nintemann et al., 2017              |
| Glutathione S-transferase F11                                | AT3G03190 | GSTF11       | Q96324        | 214        | Cytoplasm                  | Undefined               | Cytosol                    | 24                          | Any other                   | 5                         | Cytoplasm                | 93         | Cytoplasm          | 23 | 3 | Cytoplasm   |                                     |
| Glutathione S-transferase TAU 20                             | AT1G78370 | GSTU20       | Q8L7C9        | 217        | Cytoplasm                  | Undefined               | Cytosol                    | 24                          | Mitochondrion               | 4                         | Cytoplasm                | 95         | Cytoplasm, Nucleus | 47 | 3 | Cytoplasm   |                                     |
| UDP-glucosyl transferase 74C1                                | AT2G31790 | UGT74C1      | Q9SKC1        | 457        | Cell membrane              | Undefined               | Mitochondrion              | 18                          | Any other                   | 3                         | Cytoplasm                | 84         | Cytoplasm          | 14 | 2 | Cytoplasm   |                                     |
| Sulfotransferase 5b                                          | AT1G74090 | ST5b/AtSOT18 | Q9C9C9        | 350        | Cytoplasm                  | Other (e.g., Cytoplasm) | Cytosol                    | 38                          | Any other                   | 2                         | Cytoplasm                | 99         | Cytoplasm          | 82 | 3 | Cytoplasm   | Klein et al., 2006                  |
| Sulfotransferase 5c                                          | AT1G18590 | ST5c/AtSOT17 | Q9FZ80        | 346        | Cytoplasm                  | Other (e.g., Cytoplasm) | Cytosol                    | 34                          | Any other                   | 2                         | Cytoplasm                | 99         | Cytoplasm          | 82 | 3 | Cytoplasm   | Klein et al., 2006                  |
| Flavin-monoxygenase glucosinolate S-oxygenase 1              | AT1G65860 | FMOGS-OX1    | Q9SS04        | 459        | Chloroplast, Cytoplasm     | Undefined               | Cytosol                    | 20                          | Any other                   | 5                         | Chloroplast              | 88         | Plasma membrane    | 13 | 2 | Cytosol     | Li et al., 2010                     |
| Flavin-monoxygenase glucosinolate S-oxygenase 2              | AT1G62540 | FMOGS-OX2    | Q94K43        | 457        | Chloroplast                | Undefined               | Cytosol                    | 10                          | Secretory                   | 5                         | Cytoplasm                | 87         | Chloroplast        | 12 | 2 | Cytosol     | Li et al., 2010                     |
| Flavin-monoxygenase glucosinolate S-oxygenase 3              | AT1G62560 | FMOGS-OX3    | Q9SXE1        | 462        | Chloroplast                | Undefined               | Plastid                    | 12                          | Chloroplast                 | 5                         | Chloroplast              | 89         | Chloroplast        | 13 | 4 | Cytosol     | Li et al., 2010                     |
| Flavin-monoxygenase glucosinolate S-oxygenase 4              | AT1G62570 | FMOGS-OX4    | Q93Y23        | 461        | Chloroplast                | Undefined               | Cytosol                    | 10                          | Chloroplast                 | 5                         | Cytoplasm                | 87         | Nucleus            | 12 | 2 | Cytosol     | Li et al., 2010                     |
| Flavin-monoxygenase glucosinolate S-oxygenase 5              | AT1G12140 | FMOGS-OX5    | A8MRX0        | 459        | Chloroplast                | Undefined               | Mitochondrion              | 8                           | Chloroplast                 | 5                         | Cytoplasm                | 87         | Nucleus            | 12 | 2 | Cytosol     | Li et al., 2010                     |

|                                                            |           |                 |        |     |                             |                         |                 |    |               |   |                 |    |                 |    |   |                 |                           |
|------------------------------------------------------------|-----------|-----------------|--------|-----|-----------------------------|-------------------------|-----------------|----|---------------|---|-----------------|----|-----------------|----|---|-----------------|---------------------------|
| Flavin-monoxygenase glucosinolate S-oxygenase 6            | AT1G12130 | AtFMOGS-OX6     | Q9FWW3 | 459 | Chloroplast                 | Undefined               | Plastid         | 12 | Mitochondrion | 4 | Cytoplasm       | 87 | Chloroplast     | 12 | 2 |                 |                           |
| Flavin-monoxygenase glucosinolate S-oxygenase 7            | AT1G12160 | AtFMOGS-OX7     | Q9FWW6 | 470 | Chloroplast                 | Undefined               | Mitochondrion   | 10 | Chloroplast   | 5 | Cytoplasm       | 89 | Plasma membrane | 11 | 2 |                 |                           |
| Alkenyl hydroxalkyl producing 1                            | AT4G03070 | AtAOP1          | Q9ZTA3 | 322 | Cytoplasm                   | Undefined               | Cytosol         | 10 | Any other     | 3 | Cytoplasm       | 80 | Nucleus         | 18 | 2 |                 |                           |
| Alkenyl hydroxalkyl producing 2                            | AT4G03060 | AOP2            |        | 399 | Cytoplasm                   | Undefined               | Undefined       |    | Undefined     |   | Cytoplasm       | 88 | Plasma Membrane | 13 | 2 | Cytoplasm       | Zhang et al., 2015        |
| 2-oxoglutarate-dependent dioxygenase                       | AT4G03050 | AOP3            | Q9ZTA1 | 361 | Cytoplasm                   | Secreted                | Golgi, Cytosol  | 12 | Secretory     | 5 | Cytoplasm       | 83 | Chloroplast     | 16 | 2 | Cytosol         | Jensen et al., 2015       |
| 2-Oxoglutarate-dependent dioxygenase                       | AT2G25450 | GS-OH           | Q9SKK4 | 359 | Cytoplasm                   | Other (e.g., Cytoplasm) | Cytosol         | 22 | Any other     | 2 | Cytoplasm       | 87 | Cytoplasm       | 16 | 3 | Cytoplasm       |                           |
| Myb transcription factor 28                                | AT5G61420 | MYB28/HAG1/PMG1 | Q9SPG2 | 366 | Nucleus                     | Undefined               | Nucleus         | 48 | Any other     | 2 | Nucleus         | 99 | Nucleus         | 37 | 4 | Nucleus         | Yatusevich 2008           |
| Myb transcription factor 29                                | AT5G07690 | MYB29/PMG2/RAO7 | Q9FLR1 | 366 | Nucleus                     | Other (e.g., Cytoplasm) | Nucleus         | 30 | Any other     | 2 | Nucleus         | 93 | Nucleus         | 35 | 4 | Nucleus         | Yatusevich 2008           |
| Myb transcription factor 76                                | AT5G07700 | MYB76           | Q9SPG5 | 338 | Nucleus                     | Other                   | Nucleus         | 30 | Any other     | 2 | Nucleus         | 92 | Nucleus         | 35 | 4 | Nucleus         | Yatusevich 2008           |
| <b>INDOLIC GLUCOSINOLATE BIOSYNTHESIS AND MODIFICATION</b> |           |                 |        |     |                             |                         |                 |    |               |   |                 |    |                 |    |   |                 |                           |
| Tryptophan synthase beta 1                                 | AT5G54810 | TSB1            | P14671 | 470 | Chloroplast                 | Chloroplast             | Plastid         | 70 | Chloroplast   | 1 | Cytoplasm       | 88 | Nucleus         | 14 | 3 | Chloroplast     |                           |
| Anthraniolate synthase, alpha subunit, component 1-1       | AT5G05730 | ASA1            | P32068 | 624 | Chloroplast                 | Undefined               | Plastid         | 68 | Chloroplast   | 5 | Cytoplasm       | 81 | Nucleus         | 13 | 2 |                 |                           |
| Cytochrome P450 79A2                                       | AT5G05260 | CYP79A2         | Q9FLC8 | 523 | ER                          | Undefined               | ER              | 18 | Mitochondrion | 5 | ER membrane     | 85 | ER              | 14 | 4 | ER              |                           |
| Cytochrome P450 79B2                                       | AT4G39950 | CYP79B2         | O81346 | 541 | ER                          | Undefined               | Cytosol         | 12 | Any other     | 3 | ER membrane     | 86 | ER              | 15 | 3 | ER              |                           |
| Cytochrome P450 79B3                                       | AT2G22330 | CYP79B3         | Q501D8 | 543 | ER                          | Undefined               | Plasma membrane | 10 | Any other     | 4 | ER membrane     | 85 | Nucleus         | 13 | 2 |                 |                           |
| Cytochrome P450 83B1                                       | AT4G31500 | CYP83B1         | O65782 | 499 | ER                          | Undefined               | ER              | 56 | Secretory     | 5 | ER              | 83 | ER              | 13 | 4 | ER              |                           |
| Glutathione S-transferase F9                               | AT2G30860 | GSTF9           | O80852 | 215 | Cytoplasm                   | Undefined               | Cytosol         | 32 | Any other     | 4 | Cytoplasm       | 95 | Cytoplasm       | 60 | 3 | Cytoplasm       |                           |
| Glutathione S-transferase F10                              | AT2G30870 | GSTF10          | P42761 | 215 | Cytoplasm                   | Undefined               | Cytosol         | 38 | Secretory     | 5 | Cytoplasm       | 89 | Cytoplasm       | 38 | 3 | Cytoplasm       |                           |
| UDP-glucosyl transferase 74B1                              | AT1G24100 | UGT74B1         | O48676 | 460 | Cell membrane, Chloroplast. | Undefined               | Plasma membrane | 14 | Any other     | 3 | Cytoplasm       | 84 | Chloroplast     | 12 | 2 |                 |                           |
| Sulfotransferase 5a                                        | AT1G74100 | AtSOT16/ST5a    | Q9C9D0 | 338 | Cytoplasm                   | Other (e.g., Cytoplasm) | Cytosol         | 38 | Any other     | 2 | Cytoplasm       | 99 | Cytoplasm       | 84 | 3 | Cytoplasm       | Klein et al., 2006        |
| Cytochrome P450 81F2                                       | AT5G57220 | CYP81F2         | Q9LVD6 | 491 | ER                          | Secreted                | ER              | 28 | Secretory     | 2 | ER              | 82 | Plasma membrane | 13 | 3 | ER              | Fuchs et al., 2016        |
| Cytochrome P450 81F4                                       | AT4G37410 | CYP81F4         | Q9SZU1 | 501 | ER                          | Undefined               | ER              | 54 | Secretory     | 4 | ER membrane     | 82 | ER              | 13 | 4 | ER              |                           |
| Myb transcription factor 51                                | AT1G18570 | MYB51           | O49782 | 352 | Nucleus                     | Undefined               | Nucleus         | 28 | Any other     | 2 | Nucleus         | 91 | Nucleus         | 42 | 4 | Nucleus         | Gigolashvili et al., 2007 |
| Myb transcription factor 34                                | AT5G60890 | MYB34           | O64399 | 295 | Nucleus                     | Other (e.g., Cytoplasm) | Nucleus         | 44 | Any other     | 2 | Nucleus         | 90 | Nucleus         | 44 | 4 | Nucleus         |                           |
| Myb transcription factor 122                               | AT1G74080 | MYB122          | Q9C9C8 | 333 | Nucleus                     | Undefined               | Nucleus         | 30 | Any other     | 3 | Nucleus         | 91 | Nucleus         | 35 | 4 | Nucleus         |                           |
| Gamma-glutamyl peptidase 1                                 | AT4G30530 | GGP1            | Q9M0A7 | 250 | Chloroplast                 | Secreted                | Cytosol         | 20 | Secretory     | 5 | Cytoplasm       | 82 | Cytoplasm       | 20 | 2 | Cytosol         | Geu-Flores et al., 2011   |
| Supper root 1                                              | AT2G20610 | SUR1            | Q9SIV0 | 462 | Chloroplast                 | Undefined               | Cytosol         | 14 | Any other     | 3 | Mitochondrion   | 80 | Nucleus         | 15 | 0 |                 |                           |
| Indole glucosinolate O-methyltransferase 1                 | AT1G21100 | AtIGMT1         | Q9LPU5 | 373 | Chloroplast                 | Other (e.g., Cytoplasm) | Cytosol         | 24 | Any other     | 1 | Cytoplasm       | 82 | Nucleus         | 14 | 2 |                 |                           |
| Indole glucosinolate O-methyltransferase 2                 | AT1G21120 | AtIGMT2         | Q9LPU7 | 373 | Chloroplast                 | Other (e.g., Cytoplasm) | Cytosol         | 24 | Any other     | 1 | Cytoplasm       | 82 | Cytoplasm       | 13 | 2 | Cytoplasm       |                           |
| Indole glucosinolate O-methyltransferase 3                 | AT1G21110 | AtIGMT3         | Q9LPU6 | 373 | Chloroplast                 | Other (e.g., Cytoplasm) | Cytosol         | 22 | Any other     | 1 | Cytoplasm       | 82 | Cytoplasm       | 13 | 2 | Cytoplasm       |                           |
| Indole glucosinolate O-methyltransferase 4                 | AT1G21130 | AtIGMT4         | Q3ED84 | 373 | Chloroplast                 | Other (e.g., Cytoplasm) | Cytosol         | 24 | Any other     | 1 | Cytoplasm       | 83 | Cytoplasm       | 14 | 2 | Cytoplasm       |                           |
| Indole glucosinolate O-methyltransferase 5                 | AT1G76790 | AtIGMT5         | Q9SRD4 | 367 | Chloroplast                 | Other (e.g., Cytoplasm) | Cytosol         | 24 | Any other     | 2 | Cytoplasm       | 83 | Plasma membrane | 14 | 2 |                 |                           |
| <b>BENZOYLOXY GLUCOSINOLATE BIOSYNTHESIS</b>               |           |                 |        |     |                             |                         |                 |    |               |   |                 |    |                 |    |   |                 |                           |
| Myb transcription factor 115                               | AT5G40360 | MYB115          | Q1PDP9 | 359 | Nucleus                     | Undefined               | Nucleus         | 28 | Any other     | 4 | Nucleus         | 87 | Mitochondria    | 13 | 3 | Nucleus         | Wang et al., 2017         |
| Myb transcription factor 118                               | AT3G27785 | MYB118          | Q9LVW4 | 437 | Nucleus                     | Undefined               | Nucleus         | 48 | Any other     | 5 | Nucleus         | 86 | Nucleus         | 18 | 4 | Nucleus         | Du et al., 2018           |
| <b>GLUCOSINOLATE TRANSPORT</b>                             |           |                 |        |     |                             |                         |                 |    |               |   |                 |    |                 |    |   |                 |                           |
| Nitrate transporter 2.10/ Glucosinolate transporter 1      | AT3G47960 | AtNPF2.10/GTR1  | Q944G5 | 636 | Vacuole                     | Undefined               | Plasma membrane | 36 | Any other     | 5 | Plasma membrane | 87 | Plasma membrane | 75 | 3 | Plasma membrane | Nour-Eldin et al., 2012   |
| Nitrate transporter 2.11/ Glucosinolate transporter 2      | AT5G62680 | AtNPF2.11/GTR2  | Q9LV10 | 616 | Vacuole                     | Other (e.g. Cytoplasm)  | Plasma membrane | 32 | Any other     | 1 | Plasma membrane | 87 | Plasma membrane | 56 | 3 | Plasma membrane | Nour-Eldin et al., 2012   |
| Nitrate transporter 1.9                                    | AT1G18880 | NPF2.9/NRT1.9   | Q9M9V7 | 587 | Vacuole                     | Other (e.g. Cytoplasm)  | Plasma membrane | 14 | Any other     | 2 | Plasma membrane | 86 | Plasma membrane | 38 | 3 | Plasma membrane | Wang and Tsay, 2011       |

|                                                                                   |           |                  |        |      |                                       |                        |                               |    |               |   |                 |    |                           |    |   |                           |                                            |
|-----------------------------------------------------------------------------------|-----------|------------------|--------|------|---------------------------------------|------------------------|-------------------------------|----|---------------|---|-----------------|----|---------------------------|----|---|---------------------------|--------------------------------------------|
| Nitrate transporter 1.7                                                           | AT1G69870 | NRT1.7           | Q8RX77 | 620  | Vacuole                               | Undefined              | Plasma membrane               | 34 | Any other     | 2 | Plasma membrane | 99 | Plasma membrane           | 78 | 3 | Plasma membrane           | Fan et al., 2009                           |
| Nitrate transporter 1.6                                                           | AT1G27080 | NRT1.6           | Q9LFX9 | 576  | Vacuole                               | Other (e.g. Cytoplasm) | Plasma membrane               | 44 | Any other     | 1 | Plasma membrane | 99 | Plasma membrane           | 76 | 3 | Plasma membrane           | Almagro et al., 2008                       |
| <b>MYROSINASE</b>                                                                 |           |                  |        |      |                                       |                        |                               |    |               |   |                 |    |                           |    |   |                           |                                            |
| Atypical myrosinase PYK10                                                         | AT3G09260 | PYK10            | Q9SR37 | 524  | ER                                    | Secreted               | ER                            | 62 | Secretory     | 1 | ER              | 99 | ER                        | 73 | 4 | ER                        | Matsushima et al., 2003                    |
| Syntaxin                                                                          | AT3G11820 | PEN1             | Q9ZSD4 | 346  | Golgi apparatus                       | Undefined              | Plasma membrane               | 60 | Any other     | 4 | Golgi membrane  | 81 | Nucleus                   | 21 | 2 | Plasma membrane           | Collins et al., 2003; Assaad et al., 2004  |
| Atypical myrosinase PEN2                                                          | AT2G44490 | PEN2/BGLU26      | O64883 | 560  | Vacuole                               | Undefined              | peroxisomes                   | 52 | Mitochondrion | 4 | peroxisome      | 99 | Peroxisome                | 70 | 3 | Peroxisomes, Mitochondria | Lipka et al., 2005; Fuchs et al., 2016     |
| AtPDR8 ABC transporter                                                            | AT1G59870 | PEN3             | Q9XIE2 | 1469 | Cell membrane, Chloroplast            | Chloroplast            | Plasma membrane               | 68 | Chloroplast   | 3 | Plasma membrane | 99 | Plasma membrane           | 76 | 4 | Plasma membrane           | Kobae et al., 2006; Stein et al., 2006     |
| Phytochelatin synthase 1                                                          | AT5G44070 | PCS1             | Q9S7Z3 | 485  | Nucleus                               | Undefined              | Cytosol                       | 36 | Any other     | 3 | Nucleus         | 87 | Nucleus                   | 13 | 3 | Cytoplasm                 | Blum et al., 2010                          |
| Thioglucoside glucohydrolase 1                                                    | AT5G26000 | TGG1/BGLU38      | P37702 | 541  | Vacuole                               | Secreted               | Vacuole                       | 46 | Secretory     | 1 | Vacuole         | 94 | Vacuole                   | 64 | 4 | Vacuole                   | Andreasson et al., 2001; Ueda et al., 2006 |
| Thioglucoside glucohydrolase 2                                                    | AT5G25980 | TGG2/BGLU37      | Q9C5C2 | 547  | Vacuole                               | Secreted               | Extracellular, Golgi, Vacuole | 26 | Secretory     | 1 | Vacuole         | 94 | Vacuole                   | 59 | 4 | Vacuole                   | Andreasson et al., 2001; Ueda et al., 2006 |
| Thioglucoside glucohydrolase 3                                                    | AT5G48375 | TGG3/BGLU39      | Q3E8E5 | 439  | Vacuole                               | Secreted               | ER                            | 18 | Secretory     | 2 | Vacuole         | 92 | Vacuole                   | 51 | 3 | Vacuole                   |                                            |
| Thioglucoside glucohydrolase 4                                                    | AT1G47600 | TGG4/BGLU34      | Q8GRX1 | 511  | Vacuole                               | Secreted               | Extracellular                 | 30 | Secretory     | 1 | Vacuole         | 88 | Chloroplast               | 21 | 2 |                           |                                            |
| Thioglucoside glucohydrolase 5                                                    | AT1G51470 | TGG5/BGLU35      | Q3ECS3 | 511  | Vacuole                               | Secreted               | Extracellular                 | 32 | Secretory     | 1 | Vacuole         | 88 | Chloroplast               | 22 | 2 |                           |                                            |
| Thioglucoside glucohydrolase 6                                                    | AT1G51490 | TGG6             | Q9C8K1 | 484  | Vacuole                               | Mitochondrion          | Mitochondrion                 | 18 | Mitochondrion | 2 | Vacuole         | 86 | Chloroplast               | 24 | 3 | Mitochondrion             |                                            |
| <b>MYROSINASE BINDING PROTEIN (MBP) AND MYROSINASE ASSOCIATED PROTEINS (MyAP)</b> |           |                  |        |      |                                       |                        |                               |    |               |   |                 |    |                           |    |   |                           |                                            |
| Myrosinase-binding protein (MBP)                                                  | AT1G52040 | MBP1             | Q9SAV0 | 462  | Cell wall, Cytoplasm, Mitochondrion   | Other (e.g. Cytoplasm) | Nucleus                       | 24 | Any other     | 1 | Cytoplasm       | 88 | Nucleus                   | 13 | 2 |                           |                                            |
| Myrosinase-binding protein                                                        | AT1G52030 | MBP2             | Q9SAV1 | 642  | Nucleus                               | Other (e.g. Cytoplasm) | Cytosol                       | 12 | Any other     | 2 | Cytoplasm       | 87 | Nucleus                   | 19 | 2 |                           |                                            |
| Myrosinase-binding protein                                                        | AT3G16450 | JAL33            | O04311 | 300  | Cell wall, Chloroplast, Mitochondrion | Other (e.g. Cytoplasm) | Nucleus                       | 34 | Any other     | 2 | Cytoplasm       | 90 | Chloroplast               | 17 | 2 |                           |                                            |
| Epithiospecifier modifier 1                                                       | AT3G14210 | ESM1             |        | 392  | Extracellular                         | Secreted               | Extracellular                 | 44 | Secretory     | 1 | Secreted        | 81 | Cytoplasm                 | 14 | 3 | Secreted                  |                                            |
| GDSL-like Lipase/Acylhydrolase superfamily protein                                | AT3G14220 | GDSL-like Lipase | Q9LJP2 | 363  | Extracellular                         | Secreted               | Extracellular                 | 40 | Secretory     | 1 | Secreted        | 81 | Extracellular or Secreted | 12 | 4 | Extracellular             |                                            |
| Modified Vacuole Phenotype1                                                       | AT1G54030 | MVP1             | Q7XA74 | 417  | Cell membrane, Extracellular          | Undefined              | Vacuole                       | 42 | Any other     | 3 | Secreted        | 83 | Extracellular or Secreted | 13 | 2 | ER                        | Agee et al., 2010                          |
| GDSL-like Lipase                                                                  | AT1G54020 | GLIP             | Q9CSN8 | 372  | Extracellular                         | Undefined              | Vacuole                       | 30 | Secretory     | 1 | Secreted        |    | Nucleus                   | 12 | 2 |                           |                                            |
| GLL23                                                                             | AT1G54010 | GLL23            | Q8W4H8 | 386  | Extracellular                         | Secreted               | Extracellular                 | 44 | Secretory     | 1 | Secreted        | 81 | Chloroplast               | 12 | 3 | Secreted                  |                                            |
| GLL22                                                                             | AT1G54000 | GLL22            | Q1H583 | 391  | Cell membrane, Extracellular          | Secreted               | Extracellular                 | 44 | Secretory     | 1 | Secreted        | 81 | Chloroplast               | 18 | 3 | Secreted                  |                                            |
| Vacuolar Morphology3/ Syntaxin of plants 22                                       | AT5G46860 | VAM3/SYP22       | P93654 | 268  | Vacuole                               | Undefined              | Vacuole                       | 64 | Mitochondrion | 5 | ER              | 81 | Vacuole                   | 63 | 3 | vacuolar membrane         | Uemura et al., 2010                        |
| <b>SPECIFIER PROTEINS</b>                                                         |           |                  |        |      |                                       |                        |                               |    |               |   |                 |    |                           |    |   |                           |                                            |
| Nitrile specifier protein 1                                                       | AT3G16400 | AtNSP1           | Q9SDM9 | 470  | Nucleus                               | Other (e.g. Cytoplasm) | Mitochondrion                 | 14 | Any other     | 2 | Cytoplasm       | 88 | Cytoplasm                 | 16 | 2 |                           |                                            |
| Nitrile specifier protein 2                                                       | AT2G33070 | AtNSP2           | O49326 | 473  | Nucleus                               | Other (e.g. Cytoplasm) | Cytosol                       | 12 | Any other     | 2 | Cytoplasm       | 89 | Nucleus                   | 17 | 2 |                           |                                            |
| Nitrile specifier protein 3                                                       | AT3G16390 | AtNSP3           | O04318 | 467  | Nucleus                               | Other (e.g. Cytoplasm) | Plastid                       | 20 | Any other     | 2 | Cytoplasm       | 88 | Cytoplasm                 | 15 | 2 |                           |                                            |
| Nitrile specifier protein 4                                                       | AT3G16410 | AtNSP4           | O04316 | 619  | Nucleus                               | Other (e.g. Cytoplasm) | Extracellular, Cytosol        | 12 | Any other     | 2 | Cytoplasm       | 90 | Nucleus                   | 13 | 2 |                           |                                            |
| Nitrile specifier protein 5                                                       | AT5G48180 | AtNSP5           | Q93XW5 | 326  | Nucleus                               | Undefined              | Cytosol                       | 22 | Any other     | 4 | Nucleus         | 80 | Nucleus                   | 19 | 3 | Nucleus                   |                                            |
| Nitrile specifier protein 6                                                       | AT3G07720 | AtNSP6           | Q9S7W4 | 329  | Nucleus                               | Undefined              | Nucleus                       | 36 | Any other     | 5 | Cytoplasm       | 80 | Nucleus                   | 23 | 3 | Nucleus                   |                                            |
| Epithiospecifier protein                                                          | AT1G54040 | AtESP            | Q8RY71 | 341  | Nucleus                               | Undefined              | Nucleus                       | 46 | Any other     | 5 | Cytoplasm       | 80 | Nucleus, Cytoplasm        | 45 | 3 | Cytosol                   | Burow et al., 2007                         |
| Harmless to ozone layer1                                                          | AT2G43910 | AtHOL1           | Q0WP12 | 246  | Chloroplast, Cytoplasm                | Other (e.g. Cytoplasm) | Cytosol                       | 36 | Any other     | 2 | Cytoplasm       | 82 | Chloroplast               | 23 | 2 | Cytoplasm                 |                                            |
| <b>OTHER RELATED PROTEINS</b>                                                     |           |                  |        |      |                                       |                        |                               |    |               |   |                 |    |                           |    |   |                           |                                            |
| Like heterochromatin protein                                                      | AT5G17690 | LHP1/TFL2        | Q946J8 | 445  | Nucleus                               | Undefined              | Nucleus                       | 70 | Any other     | 2 | Nucleus         | 99 | Nucleus                   | 67 | 4 | Nucleus                   | Zemach et al., 2006                        |

|                                                               |           |                |        |     |               |                        |                 |    |               |   |               |    |                 |    |   |                      |                                                   |
|---------------------------------------------------------------|-----------|----------------|--------|-----|---------------|------------------------|-----------------|----|---------------|---|---------------|----|-----------------|----|---|----------------------|---------------------------------------------------|
| Dof-type zinc finger DNA-binding family protein               | AT1G07640 | OBP2/At DOF1.1 | Q8L9V6 | 339 | Nucleus       | Undefined              | Nucleus         | 64 | Chloroplast   | 5 | Nucleus       | 93 | Nucleus         | 28 | 4 | Nucleus              | Yanagisawa, 2001                                  |
| Basic helix-loop-helix (BHLH) DNA-binding superfamily protein | AT3G24140 | FAMA/FMA       | Q56YJ8 | 414 | Nucleus       | Other (e.g. Cytoplasm) | Nucleus         | 68 | Any other     | 2 | Nucleus       | 99 | Nucleus         | 77 | 4 | Nucleus              | Shirakawa et al., 2014                            |
| Sulfur limitation 1/Ethylene-insensitive3-like                | AT1G73730 | SLIM1          | O23116 | 567 | Nucleus       | Other (e.g. Cytoplasm) | Nucleus         | 48 | Any other     | 2 | Nucleus       | 92 | Nucleus         | 31 | 4 | Nucleus              | Maruyama-Nakashita et al., 2006                   |
| LHP1-interacting factor 2                                     | AT4G00830 | Lif2           | Q9ASP6 | 495 | Chloroplast   | Other (e.g. Cytoplasm) | Nucleus         | 14 | Any other     | 2 | Mitochondrion | 82 | Nucleus         | 19 | 2 | Nucleus, Cytoplasm   | Latrasse et al., 2011                             |
| Tetratricopeptide repeat (TPR)-like superfamily protein       | AT1G04770 | SDI2           | Q9MAS6 | 303 | Nucleus       | Undefined              | Mitochondrion   | 10 | Mitochondrion | 5 | Cytoplasm     | 88 | Nucleus         | 15 | 2 |                      |                                                   |
| Sulfur deficiency-induced 1                                   | AT5G48850 | ATSDI1         | Q9FKB2 | 306 | Nucleus       | Other (e.g. Cytoplasm) | Nucleus         | 12 | Any other     | 2 | Cytoplasm     | 89 | Chloroplast     | 18 | 2 | Nucleus              | Aarabi et al., 2016                               |
| Benzoyloxyglucosinolate 1                                     | AT1G65880 | BZO1           | Q9SS01 | 580 | Peroxisome    | Undefined              | peroxisomes     | 36 | Any other     | 2 | peroxisome    | 86 | Plasma membrane | 12 | 3 | peroxisome           | Quan et al., 2013                                 |
| Mitogen-activated kinase 3                                    | AT3G45640 | AtMPK3         | Q39023 | 370 | Nucleus       | Other (e.g. Cytoplasm) | Cytosol         | 34 | Any other     | 2 | Nucleus       | 91 | Nucleus         | 35 | 3 | Nucleus              | Guan et al., 2014                                 |
| Mitogen-activated kinase 6                                    | AT2G43790 | AtMPK6         | Q39026 | 395 | Nucleus       | Other (e.g. Cytoplasm) | Cytosol         | 42 | Any other     | 2 | Nucleus       | 92 | Nucleus         | 37 | 3 | Nucleus              | Guan et al., 2014                                 |
| Ethylene response factor 6                                    | AT4G17490 | AtERF6         | Q8VZ91 | 282 | Nucleus       | Undefined              | Nucleus         | 48 | Any other     | 4 | Nucleus       | 93 | Nucleus         | 36 | 4 | Nucleus, Cytoplasm   | Wang et al., 2013                                 |
| BHLH transcription factors                                    | AT1G32640 | MYC2           | Q39204 | 282 | Nucleus       | Undefined              | Nucleus         | 40 | Any other     | 2 | Nucleus       | 83 | Nucleus         | 27 | 4 | Nucleus              | Chini et al., 2009                                |
| BHLH transcription factors                                    | AT5G46760 | MYC3           | Q9FIP9 | 592 | Nucleus       | Undefined              | Nucleus         | 40 | Any other     | 4 | Nucleus       | 83 | Nucleus         | 26 | 4 | Nucleus              | Cheng et al., 2011; Fernández-Calvo et al., 2011  |
| BHLH transcription factors                                    | AT4G17880 | MYC4           | O49687 | 589 | Nucleus       | Other (e.g. Cytoplasm) | Nucleus         | 40 | Any other     | 2 | Nucleus       | 84 | Nucleus         | 29 | 4 | Nucleus              | Fernández-Calvo et al., 2011                      |
| BHLH transcription factors                                    | AT5G46830 | MYC5           | Q9LUK7 | 511 | Nucleus       | Undefined              | Nucleus         | 48 | Any other     | 3 | Nucleus       | 82 | Nucleus         | 19 | 4 | Nucleus              | Qi et al., 2015                                   |
| WRKY DNA-binding protein 18                                   | AT4G31800 | WRKY18         | Q2V3D1 | 310 | Nucleus       | Undefined              | Nucleus         | 60 | Any other     | 4 | Nucleus       | 84 | Nucleus         | 25 | 4 | Nucleus              | Geilen and Böhmer, 2015                           |
| WRKY DNA-binding protein 40                                   | AT1G80840 | WRKY40         | Q9SAH7 | 302 | Nucleus       | Undefined              | Nucleus         | 58 | Any other     | 2 | Nucleus       | 86 | Nucleus         | 24 | 4 | Nucleus              | Geilen and Böhmer, 2015                           |
| <b>NITRILASE</b>                                              |           |                |        |     |               |                        |                 |    |               |   |               |    |                 |    |   |                      |                                                   |
| Nitrilase 1                                                   | AT3G44310 | AtNIT1         | P32961 | 346 | Cell membrane | Undefined              | Plastid         | 32 | Any other     | 5 | Cytoplasm     | 82 | Plasma membrane | 80 | 2 |                      |                                                   |
| Nitrilase 2                                                   | AT3G44300 | AtNIT2         | P32962 | 339 | Cell membrane | Undefined              | Plasma membrane | 22 | Any other     | 4 | Cytoplasm     | 82 | Plasma membrane | 84 | 3 | Plasma membrane      | Bartling et al., 1994 ; Grsic-Rausch et al., 2000 |
| Nitrilase 3                                                   | AT3G44320 | AtNIT3         | P46010 | 346 | Cell membrane | Undefined              | Plastid         | 16 | Any other     | 4 | Cytoplasm     | 81 | Plasma membrane | 85 | 2 |                      |                                                   |
| Nitrilase 4                                                   | AT5G22300 | AtNIT4         | P46011 | 355 | Cell membrane | Undefined              | Plasma membrane | 14 | Any other     | 3 | Cytoplasm     | 80 | Plasma membrane | 85 | 3 |                      |                                                   |
| <b>SULFUR METABOLISM</b>                                      |           |                |        |     |               |                        |                 |    |               |   |               |    |                 |    |   |                      |                                                   |
| Adenosine-5'-phosphosulfate kinase 2                          | AT4G39940 | AKN2/APK2      | O49196 | 293 | Chloroplast   | Undefined              | Plastid         | 52 | Chloroplast   | 4 | Chloroplast   | 99 | Chloroplast     | 47 | 5 | Plastid, Chloroplast | Mugford et al., 2009                              |
| Adenosine-5'-phosphosulfate kinase 1                          | AT2G14750 | APK1           | Q43295 | 276 | Chloroplast   | Chloroplast            | Plastid         | 64 | Chloroplast   | 3 | Chloroplast   | 99 | Chloroplast     | 77 | 6 | Chloroplast          | Mugford et al., 2009                              |
| <b>RuBisCO</b>                                                | AT5G14260 | RuBisCO        | Q8VZB5 | 541 | Chloroplast   | Chloroplast            | Plastid         | 58 | Chloroplast   | 1 | Chloroplast   | 99 | Chloroplast     | 12 | 6 | Chloroplast          | Jensen and Bassham, 1968                          |

## References:

1. Aarabi, F., Kusajima, M., Tohge, T., Konishi, T., Gigolashvili, T., Takamune, M., et al. (2016). Sulfur deficiency–induced repressor proteins optimize glucosinolate biosynthesis in plants. *Science Advances*, 2(10), e1601087.
2. Agee, A. E., Surpin, M., Sohn, E. J., Girke, T., Rosado, A., Kram, B. W., et al. (2010). MODIFIED VACUOLE PHENOTYPE1 is an Arabidopsis myrosinase-associated protein involved in endomembrane protein trafficking. *Plant Physiology*, 152(1), 120-132.
3. Almagro, A., Lin, S. H., & Tsay, Y. F. (2008). Characterization of the Arabidopsis nitrate transporter NRT1.6 reveals a role of nitrate in early embryo development. *The Plant Cell*, 20(12), 3289-3299.
4. Andréasson, E., Jørgensen, L. B., Höglund, A. S., Rask, L., & Meijer, J. (2001). Different myrosinase and idioblast distribution in Arabidopsis and *Brassica napus*. *Plant Physiology*, 127(4), 1750-1763.
5. Assaad, F. F., Qiu, J. L., Youngs, H., Ehrhardt, D., Zimmerli, L., Kalde, M., et al. (2004). The PEN1 syntaxin defines a novel cellular compartment upon fungal attack and is required for the timely assembly of papillae. *Molecular Biology of the Cell*, 15(11), 5118-5129.
6. Bartling, D., Seedorf, M., Schmidt, R. C., & Weiler, E. W. (1994). Molecular characterization of two cloned nitrilases from *Arabidopsis thaliana*: key enzymes in biosynthesis of the plant hormone indole-3-acetic acid. *Proceedings of the National Academy of Sciences*, 91(13), 6021-6025.
7. Blum, R., Meyer, K. C., Wünschmann, J., Lenzian, K. J., & Grill, E. (2010). Cytosolic action of phytochelatin synthase. *Plant Physiology*, 153(1), 159-169.
8. Burow, M., Rice, M., Hause, B., Gershenzon, J., & Wittstock, U. (2007). Cell-and tissue-specific localization and regulation of the epithiospecifier protein in *Arabidopsis thaliana*. *Plant Molecular Biology*, 64(1-2), 173-185.
9. Cheng, Z., Sun, L., Qi, T., Zhang, B., Peng, W., Liu, Y., & Xie, D. (2011). The bHLH transcription factor MYC3 interacts with the jasmonate ZIM-domain proteins to mediate jasmonate response in Arabidopsis. *Molecular plant*, 4(2), 279-288.
10. Chini, A., Fonseca, S., Chico, J. M., Fernández- Calvo, P., & Solano, R. (2009). The ZIM domain mediates homo- and heteromeric interactions between Arabidopsis JAZ proteins. *The Plant Journal*, 59(1), 77-87.
11. Collins, N. C., Thordal-Christensen, H., Lipka, V., Bau, S., Kombrink, E., Qiu, J. L., et al. (2003). SNARE-protein-mediated disease resistance at the plant cell wall. *Nature*, 425(6961), 973-977.
12. Diebold, R., Schuster, J., Däschner, K., & Binder, S. (2002). The branched-chain amino acid transaminase gene family in Arabidopsis encodes plastid and mitochondrial proteins. *Plant Physiology*, 129(2), 540-550.
13. Du, Y. T., Zhao, M. J., Wang, C. T., Gao, Y., Wang, Y. X., Liu, Y. W., et al. (2018). Identification and characterization of GmMYB118 responses to drought and salt stress. *BMC Plant Biology*, 18(1), 320.
14. Fan, S. C., Lin, C. S., Hsu, P. K., Lin, S. H., & Tsay, Y. F. (2009). The Arabidopsis nitrate transporter NRT1.7, expressed in phloem, is responsible for source-to-sink remobilization of nitrate. *The Plant Cell*, 21(9), 2750-2761.

15. Fernández-Calvo, P., Chini, A., Fernández-Barbero, G., Chico, J. M., Gimenez-Ibanez, S., Geerinck, J., et al. (2011). The Arabidopsis bHLH transcription factors MYC3 and MYC4 are targets of JAZ repressors and act additively with MYC2 in the activation of jasmonate responses. *The Plant Cell*, 23(2), 701-715.
16. Fuchs, R., Kopischke, M., Klapprodt, C., Hause, G., Meyer, A. J., Schwarzländer, M., et al. (2016). Immobilized subpopulations of leaf epidermal mitochondria mediate PENETRATION2-dependent pathogen entry control in Arabidopsis. *The Plant Cell*, 28(1), 130-145.
17. Geilen, K., & Böhmer, M. (2015). Dynamic subnuclear relocalisation of WRKY40 in response to abscisic acid in *Arabidopsis thaliana*. *Scientific reports*, 5, 13369.
18. Geu-Flores, F., Møldrup, M. E., Böttcher, C., Olsen, C. E., Scheel, D., & Halkier, B. A. (2011). Cytosolic  $\gamma$ -glutamyl peptidases process glutathione conjugates in the biosynthesis of glucosinolates and camalexin in Arabidopsis. *The Plant Cell*, 23(6):2456-2469..
19. Gigolashvili, T., Yatusovich, R., Berger, B., Müller, C., & Flügge, U. I. (2007). The R2R3-MYB transcription factor HAG1/MYB28 is a regulator of methionine-derived glucosinolate biosynthesis in *Arabidopsis thaliana*. *The Plant Journal*, 51(2), 247-261.
20. Grsic-Rausch, S., Kobelt, P., Siemens, J. M., Bischoff, M., & Ludwig-Müller, J. (2000). Expression and localization of nitrilase during symptom development of the clubroot disease in Arabidopsis. *Plant Physiology*, 122(2), 369-378.
21. Guan, Y., Lu, J., Xu, J., McClure, B., & Zhang, S. (2014). Two mitogen-activated protein kinases, MPK3 and MPK6, are required for funicular guidance of pollen tubes in Arabidopsis. *Plant Physiology*, 165(2), 528-533.
22. He, Y., Chen, B., Pang, Q., Strul, J. M., & Chen, S. (2010). Functional specification of Arabidopsis isopropylmalate isomerases in glucosinolate and leucine biosynthesis. *Plant and Cell Physiology*, 51(9), 1480-1487.
23. He, Y., Mawhinney, T. P., Preuss, M. L., Schroeder, A. C., Chen, B., Abraham, L., et al. (2009). A redox-active isopropylmalate dehydrogenase functions in the biosynthesis of glucosinolates and leucine in Arabidopsis. *The Plant Journal*, 60(4), 679-690.
24. Jensen, L. M., Kliebenstein, D. J., & Burow, M. (2015). Investigation of the multifunctional gene AOP3 expands the regulatory network fine-tuning glucosinolate production in Arabidopsis. *Frontiers in Plant Science*, 6, 719.
25. Jensen, R. G., & Bassham, J. A. (1968). Photosynthesis by isolated chloroplasts III. Light activation of the carboxylation reaction. *Biochimica et Biophysica Acta (BBA)-Bioenergetics*, 153(1), 227-234.
26. Klein, M., Reichelt, M., Gershenzon, J., & Papenbrock, J. (2006). The three desulfoglucosinolate sulfotransferase proteins in Arabidopsis have different substrate specificities and are differentially expressed. *The FEBS Journal*, 273(1), 122-136.
27. Knill, T., Reichelt, M., Paetz, C., Gershenzon, J., & Binder, S. (2009). Arabidopsis thaliana encodes a bacterial-type heterodimeric isopropylmalate isomerase involved in both Leu biosynthesis and the Met chain elongation pathway of glucosinolate formation. *Plant Molecular Biology*, 71(3), 227-239.
28. Kobae, Y., Sekino, T., Yoshioka, H., Nakagawa, T., Martinoia, E., & Maeshima, M. (2006). Loss of AtPDR8, a Plasma membrane ABC transporter of *Arabidopsis thaliana*, causes hypersensitive cell death upon pathogen infection. *Plant and Cell Physiology*, 47(3), 309-318.

29. Kroymann, J., Textor, S., Tokuhisa, J. G., Falk, K. L., Bartram, S., Gershenzon, J., & Mitchell-Olds, T. (2001). A gene controlling variation in Arabidopsis glucosinolate composition is part of the methionine chain elongation pathway. *Plant Physiology*, *127*(3), 1077-1088.
30. Latrasse, D., Germann, S., Houba-Hérin, N., Dubois, E., Bui-Prodhomme, D., Hourcade, D., et al. (2011). Control of flowering and cell fate by LIF2, an RNA binding partner of the polycomb complex component LHP1. *PloS One*, *6*(1), e16592.
31. Li, J., Kristiansen, K. A., Hansen, B. G., & Halkier, B. A. (2010). Cellular and subcellular localization of flavin-monooxygenases involved in glucosinolate biosynthesis. *Journal of Experimental Botany*, *62*(3), 1337-1346.
32. Lipka, V., Dittgen, J., Bednarek, P., Bhat, R., Wiermer, M., Stein, M., et al. (2005). Pre- and postinvasion defenses both contribute to nonhost resistance in Arabidopsis. *Science*, *310*(5751), 1180-1183.
33. Maruyama-Nakashita, A., Nakamura, Y., Tohge, T., Saito, K., & Takahashi, H. (2006). Arabidopsis SLIM1 is a central transcriptional regulator of plant sulfur response and metabolism. *The Plant Cell*, *18*(11), 3235-3251.
34. Matsushima, R., Kondo, M., Nishimura, M., & Hara-Nishimura, I. (2003). A novel ER-derived compartment, the ER body, selectively accumulates a  $\beta$ -glucosidase with an ER-retention signal in Arabidopsis. *The Plant Journal*, *33*(3), 493-502.
35. Mugford, S. G., Yoshimoto, N., Reichelt, M., Wirtz, M., Hill, L., Mugford, S. T., et al. (2009). Disruption of adenosine-5'-phosphosulfate kinase in Arabidopsis reduces levels of sulfated secondary metabolites. *The Plant Cell*, *21*(3), 910-927.
36. Nintemann, S. J., Vik, D., Svozil, J., Bak, M., Baerenfaller, K., Burow, M., & Halkier, B. A. (2017). Unravelling protein-protein interaction networks linked to aliphatic and indole glucosinolate biosynthetic pathways in Arabidopsis. *Frontiers in Plant Science*, *8*, 2028.
37. Nour-Eldin, H. H., Andersen, T. G., Burow, M., Madsen, S. R., Jørgensen, M. E., Olsen, C. E., et al. (2012). NRT/PTR transporters are essential for translocation of glucosinolate defence compounds to seeds. *Nature*, *488*(7412), 531-534.
38. Qi, T., Huang, H., Song, S., & Xie, D. (2015). Regulation of jasmonate-mediated stamen development and seed production by a bHLH-MYB complex in Arabidopsis. *The Plant Cell*, *27*(6), 1620-1633.
39. Quan, S., Yang, P., Cassin-Ross, G., Kaur, N., Switzenberg, R., Aung, K., et al. (2013). Proteome analysis of peroxisomes from etiolated Arabidopsis seedlings identifies a peroxisomal protease involved in  $\beta$ -oxidation and development. *Plant Physiology*, *163*(4), 1518-1538.
40. Reintanz, B., Lehnen, M., Reichelt, M., Gershenzon, J., Kowalczyk, M., Sandberg, G., et al. (2001). bus, a bushy Arabidopsis CYP79F1 knockout mutant with abolished synthesis of short-chain aliphatic glucosinolates. *The Plant Cell*, *13*(2), 351-367.
41. Schuster, J., Knill, T., Reichelt, M., Gershenzon, J., & Binder, S. (2006). Branched-chain aminotransferase4 is part of the chain elongation pathway in the biosynthesis of methionine-derived glucosinolates in Arabidopsis. *The Plant Cell*, *18*(10), 2664-2679.
42. Shirakawa, M., Ueda, H., Nagano, A. J., Shimada, T., Kohchi, T., & Hara-Nishimura, I. (2014). FAMA is an essential component for the differentiation of two distinct cell types, myrosin cells and guard cells, in Arabidopsis. *The Plant Cell*, *26*(10), 4039-4052.
43. Stein, M., Dittgen, J., Sánchez-Rodríguez, C., Hou, B. H., Molina, A., Schulze-Lefert, P., et al. (2006). Arabidopsis PEN3/PDR8, an ATP binding cassette transporter, contributes to

- nonhost resistance to inappropriate pathogens that enter by direct penetration. *The Plant Cell*, 18(3), 731-746.
44. Textor, S., De Kraker, J. W., Hause, B., Gershenzon, J., & Tokuhiya, J. G. (2007). MAM3 catalyzes the formation of all aliphatic glucosinolate chain lengths in *Arabidopsis*. *Plant Physiology*, 144(1), 60-71.
  45. Ueda, H., Nishiyama, C., Shimada, T., Koumoto, Y., Hayashi, Y., Kondo, M., et al. (2006). AtVAM3 is required for normal specification of idioblasts, myrosin cells. *Plant and Cell Physiology*, 47(1), 164-175.
  46. Uemura, T., Morita, M. T., Ebine, K., Okatani, Y., Yano, D., Saito, C., et al. (2010). Vacuolar/pre-vacuolar compartment QaSNAREs VAM3/SYP22 and PEP12/SYP21 have interchangeable functions in *Arabidopsis*. *The Plant Journal*, 64(5), 864-873.
  47. Wang, L., Ran, L., Hou, Y., Tian, Q., Li, C., Liu, R., et al. (2017). The transcription factor MYB115 contributes to the regulation of proanthocyanidin biosynthesis and enhances fungal resistance in poplar. *New Phytologist*, 215(1), 351-367.
  48. Wang, P., Du, Y., Zhao, X., Miao, Y., & Song, C. P. (2013). The MPK6-ERF6-ROSE7/GCC-box complex modulates oxidative gene transcription and the oxidative response in *Arabidopsis thaliana*. *Plant physiology*, 161(3):1392-1408.
  49. Wang, Y. Y., & Tsay, Y. F. (2011). *Arabidopsis* nitrate transporter NRT1. 9 is important in phloem nitrate transport. *The Plant Cell*, 23(5), 1945-1957.
  50. Yanagisawa, S. (2001). The transcriptional activation domain of the plant-specific Dof1 factor functions in plant, animal, and yeast cells. *Plant and Cell Physiology*, 42(8), 813-822.
  51. Yatushevich, R. (2008). Analysis of the MYB28, MYB29 and MYB76 transcription factors involved in the biosynthesis of aliphatic glucosinolates in *Arabidopsis thaliana*. *Doctoral dissertation*, Universität zu Köln, Germany.
  52. Zemach, A., Li, Y., Ben-Meir, H., Oliva, M., Mosquana, A., Kiss, V., et al. (2006). Different domains control the localization and mobility of LIKE HETEROCHROMATIN PROTEIN1 in *Arabidopsis* nuclei. *The Plant Cell*, 18(1), 133-145.
  53. Zhang, J., Liu, Z., Liang, J., Wu, J., Cheng, F., & Wang, X. (2015). Three genes encoding AOP2, a protein involved in aliphatic glucosinolate biosynthesis, are differentially expressed in *Brassica rapa*. *Journal of Experimental Botany*, 66(20), 6205-6218.
